# Supplementary material for: Characterization of four Escherichia albertii isolates collected from animals living in Antarctica and Patagonia
Source: PubMed Central journal article supplement — J Vet Med Sci. 2017 Dec 15;80(1):138–46. doi: 10.1292/jvms.17-0492 (PMC5797873; doi:10.1292/jvms.17-0492), 2017-12-15
Supplement: jvms-80-138-s001.pdf [file jvms-80-138-s001.pdf]

## 1 SUPPORTING INFORMATION

2 **Table S1.** *Escherichia* strains used in this study

| Isolate | Source                          | Locality                               | Date sampling | of Biochemical identification <sup>a</sup> | 16S rDNA identification <sup>b</sup> |
|---------|---------------------------------|----------------------------------------|---------------|--------------------------------------------|--------------------------------------|
| P4652   | Feces of seal                   | Lachman cape, J. Ross Island           | 27.1. 2013    | <i>E. coli</i> atypical and inactive       | <i>E. albertii</i>                   |
| P4653   | Fresh feces of seal             | Lachman cape, J. Ross Island           | 27.1. 2013    | <i>E. coli</i> atypical and inactive       | <i>E. albertii</i>                   |
| P4656   | Feces of seal                   | J.G. Mendel station, J.Ross Island     | 6.2. 2013     | <i>E. coli</i>                             | <i>E. coli</i>                       |
| P4657   | Feces of seal                   | J.G. Mendel station, J.Ross Island     | 6.2. 2013     | <i>E. coli</i>                             | <i>E. coli</i>                       |
| P4664   | Feces of seal                   | Lachman cape, J. Ross Island           | 31.1. 2013    | <i>E. coli</i>                             | <i>E. coli</i>                       |
| P4665   | Feces of seal                   | Lachman cape, J. Ross Island           | 31.1. 2013    | <i>E. coli</i>                             | <i>E. coli</i>                       |
| P4722   | Perianal smear of seal          | Lachman cape, J. Ross Island           | 27.1. 2013    | <i>E. coli</i>                             | <i>E. coli</i>                       |
| P4733   | Feces of seal                   | Lachman cape, J.Ross Island            | 28.1. 2013    | <i>E. coli</i>                             | <i>E. coli</i>                       |
| P4740   | Feces of seal                   | Lachman cape, J. Ross Island           | 28.1. 2013    | <i>E. coli</i> atypical and inactive       | <i>E. albertii</i>                   |
| P5601   | Feces of skua                   | J.G. Mendel station, J. Ross Island    | 1.2. 2014     | <i>E. coli</i>                             | <i>E. coli</i>                       |
| P5602   | Feces of skua                   | Lachman lake, J. Ross Island           | 2.2. 2014     | <i>E. coli</i>                             | <i>E. coli</i>                       |
| P5604   | Feces of skua                   | Lachman lake, J. Ross Island           | 2.2. 2014     | <i>E. coli</i>                             | <i>E. coli</i>                       |
| P5644   | Perianal smear of elephant seal | beach below Bibby hill, J. Ross Island | 14.2. 2014    | <i>E. coli</i>                             | <i>E. coli</i>                       |
| P5645   | Faeces of seal                  | Brandy Bay, J. Ross Island             | 11.2. 2014    | <i>E. coli</i>                             | <i>E. coli</i>                       |
| P5646   | Perianal smear of seal          | J.G. Mendel station, J. Ross Island    | 17.2. 2014    | <i>E. coli</i>                             | <i>E. coli</i>                       |
| P5647   | Perianal smear of seal          | J.G. Mendel station, J. Ross Island    | 17.2. 2014    | <i>E. coli</i>                             | <i>E. coli</i>                       |
| P5648   | Perianal smear of seal          | Halozetes valley, J. Ross Island       | 17.2. 2014    | <i>E. coli</i>                             | <i>E. coli</i>                       |
| P5650   | Fresh feces of skua             | Area below Bibby hill, J. Ross Island  | 18.2. 2014    | <i>E. coli</i>                             | <i>E. coli</i>                       |
| P5654   | Feces of skua                   | J.G. Mendel station, J. Ross Island    | 22.2. 2014    | <i>E. coli</i>                             | <i>E. coli</i>                       |
| P5655   | Fresh feces of penguin          | Marambio station, Seymour Island       | 26.2. 2014    | <i>E. coli</i>                             | <i>E. coli</i>                       |
| P5656   | Fresh feces of gull             | Marambio station, Seymour Island       | 26.2. 2014    | <i>E. coli</i>                             | <i>E. coli</i>                       |
| P5657   | Fresh feces of gull             | Marambio station, Seymour Island       | 1.3. 2014     | <i>E. coli</i>                             | <i>E. coli</i>                       |
| P5658   | Fresh feces of skua             | Marambio station, Seymour Island       | 1.3. 2014     | <i>E. coli</i>                             | <i>E. coli</i>                       |
| P5659   | Fresh feces of penguin          | Marambio station, Seymour Island       | 1.3. 2014     | <i>E. coli</i>                             | <i>E. coli</i>                       |

| <b>Isolate</b> | <b>Source</b>             | <b>Locality</b>                     | <b>Date sampling</b> | <b>of Biochemical identification<sup>a</sup></b> | <b>16S rDNA identification<sup>b</sup></b> |
|----------------|---------------------------|-------------------------------------|----------------------|--------------------------------------------------|--------------------------------------------|
| P5661          | Fresh feces of penguin    | Isla Magdalena, Patagonia           | 7.3. 2014            | <i>E. coli</i> atypical and inactive             | <i>E. albertii</i>                         |
| P5663          | Fresh feces of penguin    | Isla Magdalena, Patagonia           | 7.3. 2014            | <i>E. coli</i>                                   | <i>E. coli</i>                             |
| P5664          | Fresh feces of penguin    | Isla Magdalena, Patagonia           | 7.3. 2014            | <i>E. coli</i>                                   | <i>E. coli</i>                             |
| P5665          | Feces (unknown)           | Lachman lake, J. Ross Island        | 14.2. 2014           | <i>E. coli</i>                                   | <i>E. coli</i>                             |
| P5666          | Feces (unknown)           | Lachman lake, J. Ross Island        | 14.2. 2014           | <i>E. coli</i>                                   | <i>E. coli</i>                             |
| P5668          | Feces of skua             | J.G. Mendel station, J. Ross Island | 14.2. 2014           | <i>E. coli</i>                                   | <i>E. coli</i>                             |
| P5669          | Feces of skua             | J.G. Mendel station, J. Ross Island | 14.2. 2014           | <i>E. coli</i>                                   | <i>E. coli</i>                             |
| P5725          | Lower reaches of a stream | Solorina valley, J. Ross Island     | 14.2. 2014           | <i>E. coli</i>                                   | <i>E. coli</i>                             |
| P5726          | Lower reaches of a stream | Solorina valley, J. Ross Island     | 14.2. 2014           | <i>E. coli</i>                                   | <i>E. coli</i>                             |
| P5790          | Smear from penguin cloaca | Marambio station, Seymour Island    | 1.3. 2014            | <i>E. coli</i>                                   | <i>E. coli</i>                             |
| P5791          | Smear from penguin cloaca | Marambio station, Seymour Island    | 1.3. 2014            | <i>E. coli</i>                                   | <i>E. coli</i>                             |
| P5792          | Smear from penguin cloaca | Marambio station, Seymour Island    | 1.3. 2014            | <i>E. coli</i>                                   | <i>E. coli</i>                             |
| P5793          | Smear from penguin cloaca | Marambio station, Seymour Island    | 1.3. 2014            | <i>E. coli</i>                                   | <i>E. coli</i>                             |
| P5794          | Smear from penguin cloaca | Marambio station, Seymour Island    | 1.3. 2014            | <i>E. coli</i>                                   | <i>E. coli</i>                             |
| P5795          | Smear from penguin cloaca | Marambio station, Seymour Island    | 1.3. 2014            | <i>E. coli</i>                                   | <i>E. coli</i>                             |
| P5797          | Smear from penguin cloaca | Marambio station, Seymour Island    | 1.3. 2014            | <i>E. coli</i>                                   | <i>E. coli</i>                             |
| P5798          | Smear from penguin cloaca | Marambio station, Seymour Island    | 1.3. 2014            | <i>E. coli</i>                                   | <i>E. coli</i>                             |

<sup>a</sup>According to ENTERO-test 24 and Biolog Identification System (GN2 MicroPlate).

<sup>b</sup>Analyses of 1352 bp of 16Sr DNA (out of 1,494 bp) coordinates 58-1409 (according to AJ508775).

3  
4
